# Supplementary material
Source: PubMed Central journal article supplement (PMC2728176)

# Supplementary Figure 1

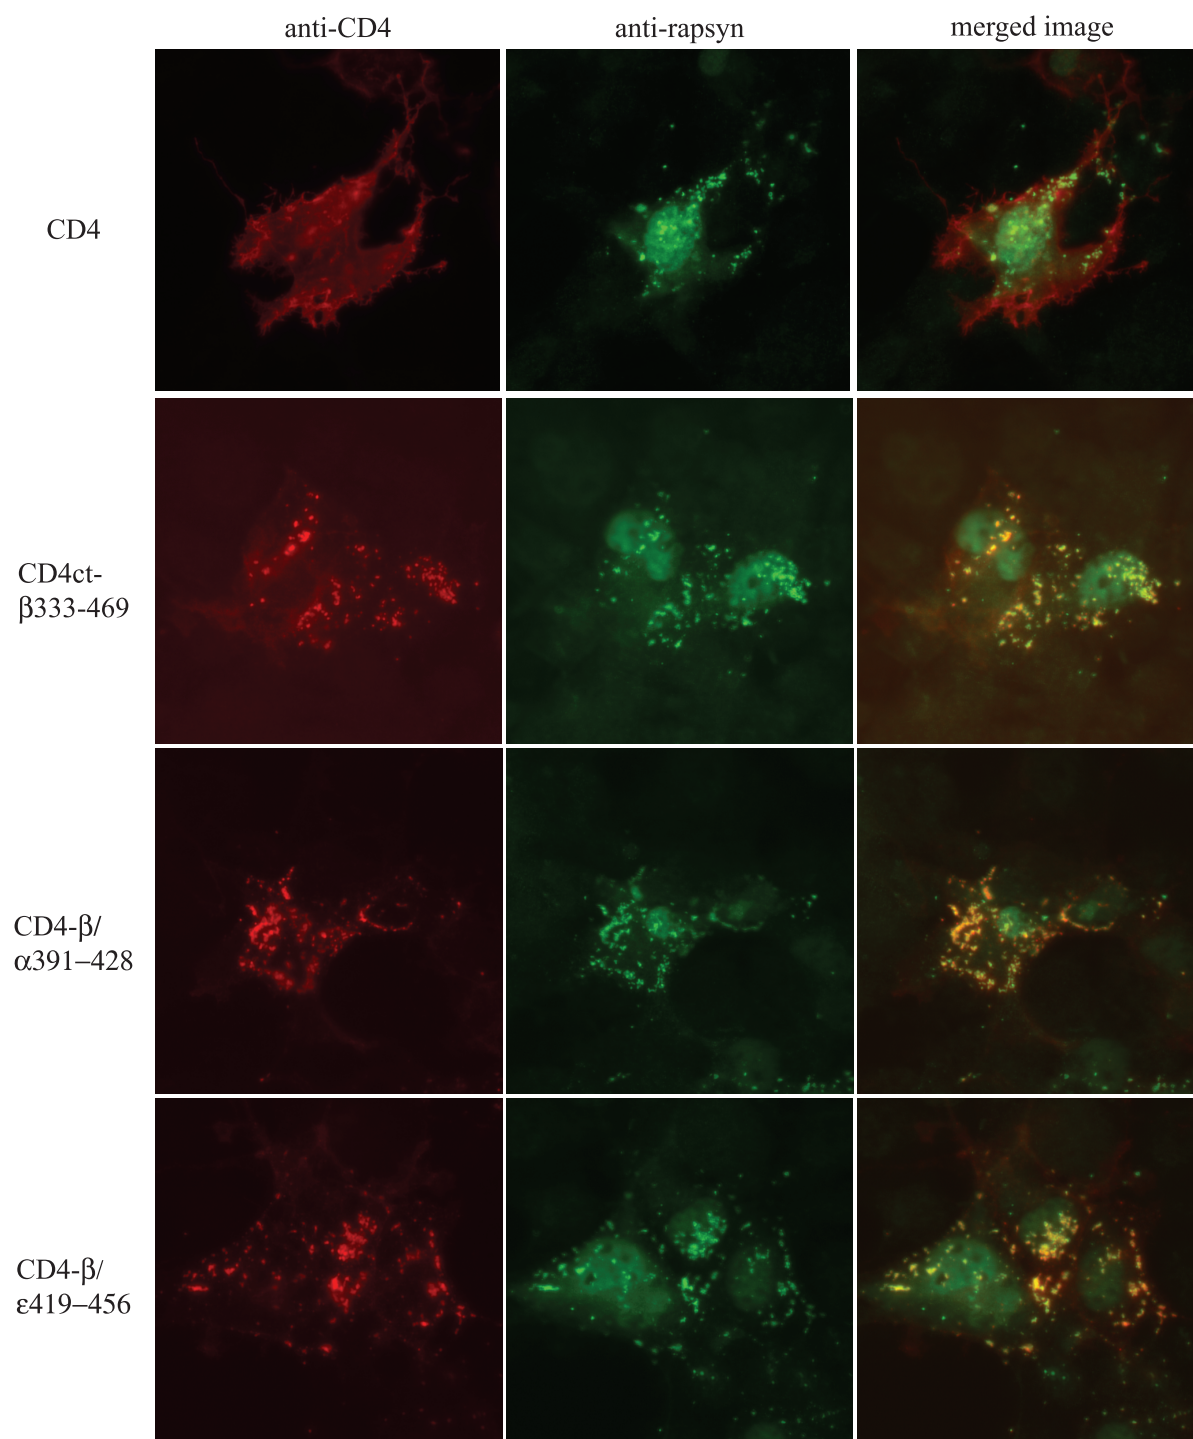

Supplement: NIHMS127521-supplement-01.pdf [file NIHMS127521-supplement-01.pdf]
